# Supplementary material for: Central Corneal Thickness and Systemic Hypertension: The Colombian Glaucoma study.
Source: Research Square preprint supplement (doi:10.21203/rs.3.rs-2359593/v1), 2023-03-14
Supplement: Supplementary file 1 [file 77983732a85000d47084eb4c.xlsx]

## Sheet: Sheet1
	Linear Regression Analysis
	Central Corneal Thickness	Coef.	Std. Err.	P> value	[95% Conf.	Interval]
					inferior	Superior
	Age ( years)
	60 - 69	-0.56	1.98	0.777	-4.45	3.33
	70 -79	-2.53	2.19	0.249	-6.82	1.77
	>80	-6.7	3.5	0.055	-13.56	0.15
	Sex ( base : male)
	female	-5.52	1.69	0.001	-8.83	-2.21
	Ethnicity
	African - Colombian	-9.93	2.97	0.001	-15.76	-4.11
	White	-1.76	2.46	0.473	-6.58	3.05
	Body Mass Index
	Overwight	-1.68	1.94	0.387	-5.49	2.13
	Obesity	3.7	2.1	0.078	-0.42	7.82
	Intraocular Pressure	1.48	0.25	0	0.98	1.97
	Systemic Hypertension	-7.58	2.58	0.003	-12.64	-2.52
