# Supplementary material for: Central Corneal Thickness and Systemic Hypertension: The Colombian Glaucoma study.
Source: Research Square preprint supplement (doi:10.21203/rs.3.rs-2359593/v1), 2023-03-14
Supplement: Supplementary file 2 [file 85b7650617c77bfc07446d15.xlsx]

## Sheet: Sheet1
	Table 1
			Central Corneal Thickness		p value
		Sex	mean	n
		Male	542.439	702	<0.001
		Female	536.962	1272
		Systemic Hypertension			0,000
		No	546.565	214
		Yes	537.978	1760
		Total	538.909	1974
		Time of diagnosis of Systemic Hypertension
		years
		0-5	540.741	528	<0.04
		5 - 10	537.094	373
		>10	536.759	844
		Total	538.036	1974
